# Supplementary material
Source: PubMed Central journal article supplement (PMC6063493)

Supplemental Figure 1.

**A**

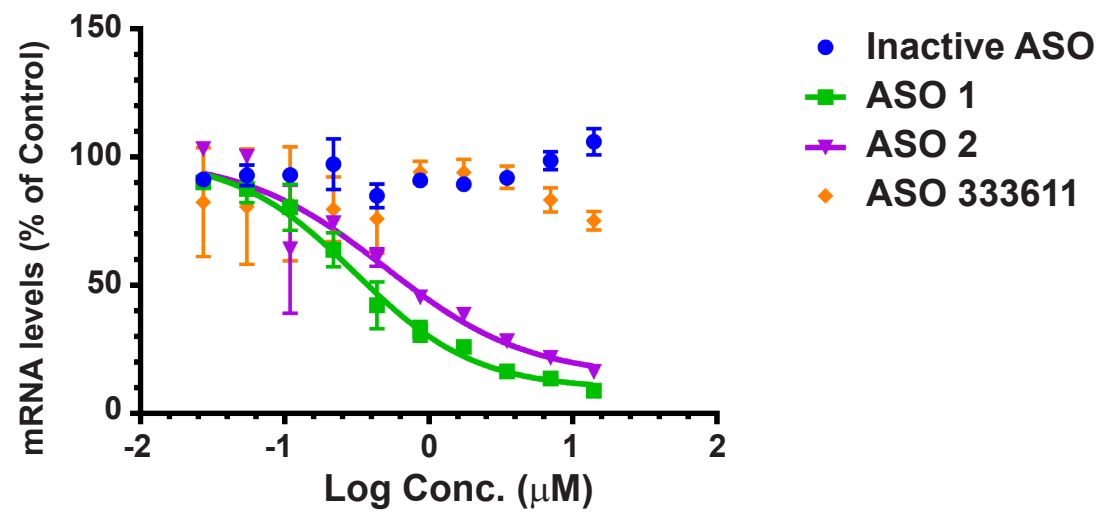

**B**

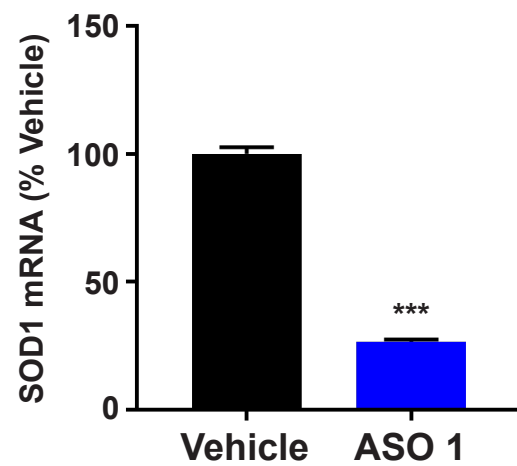

## Supplemental Figure 2.

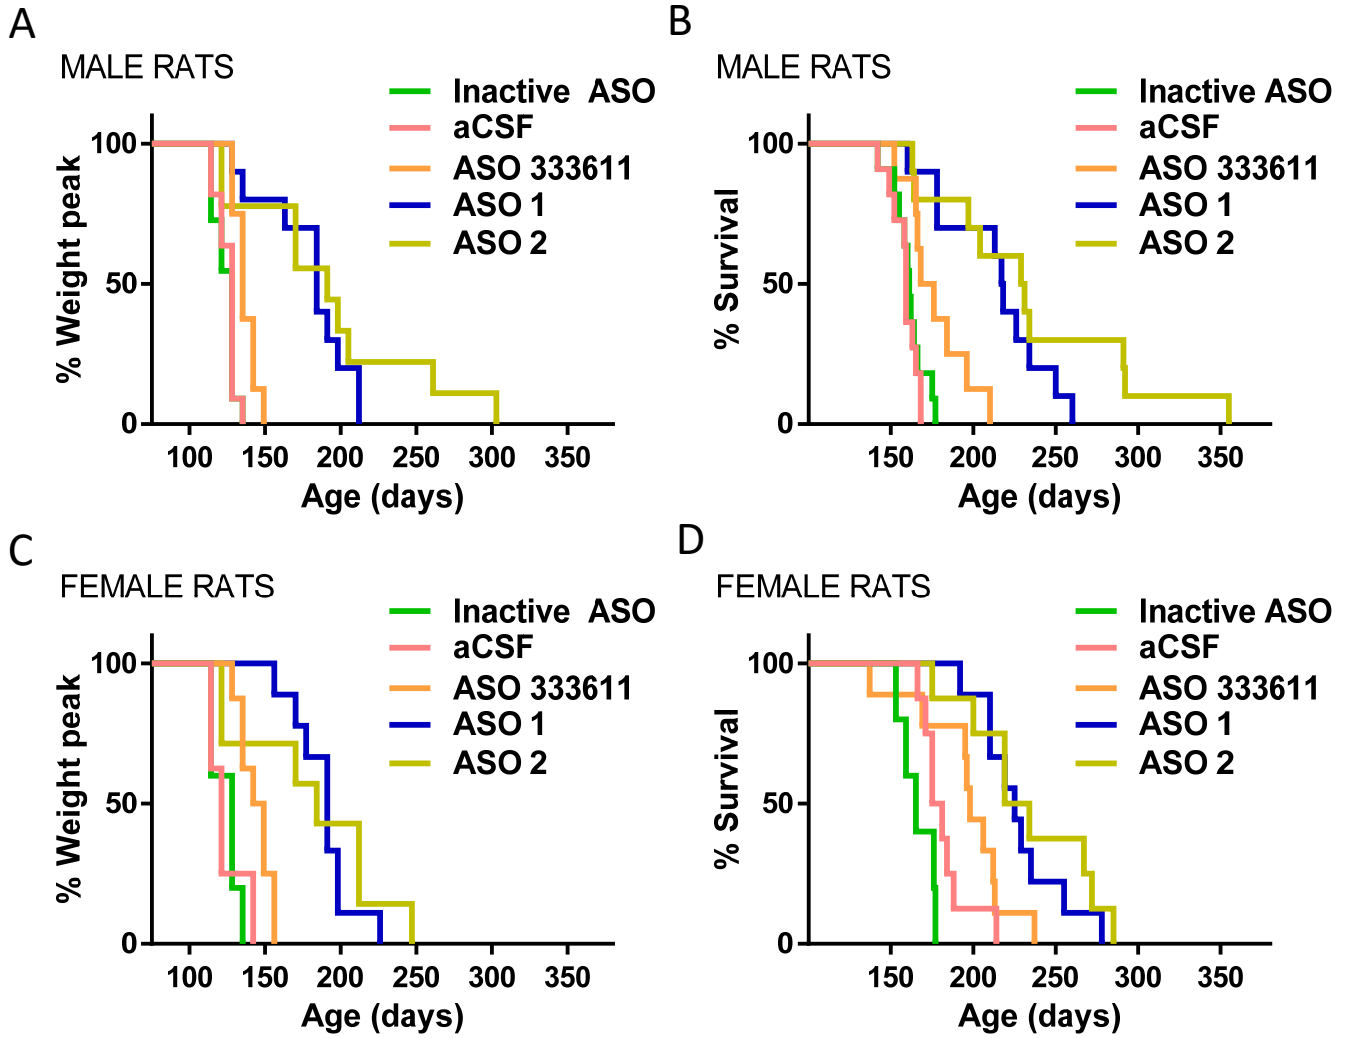

Supplemental Figure 3.

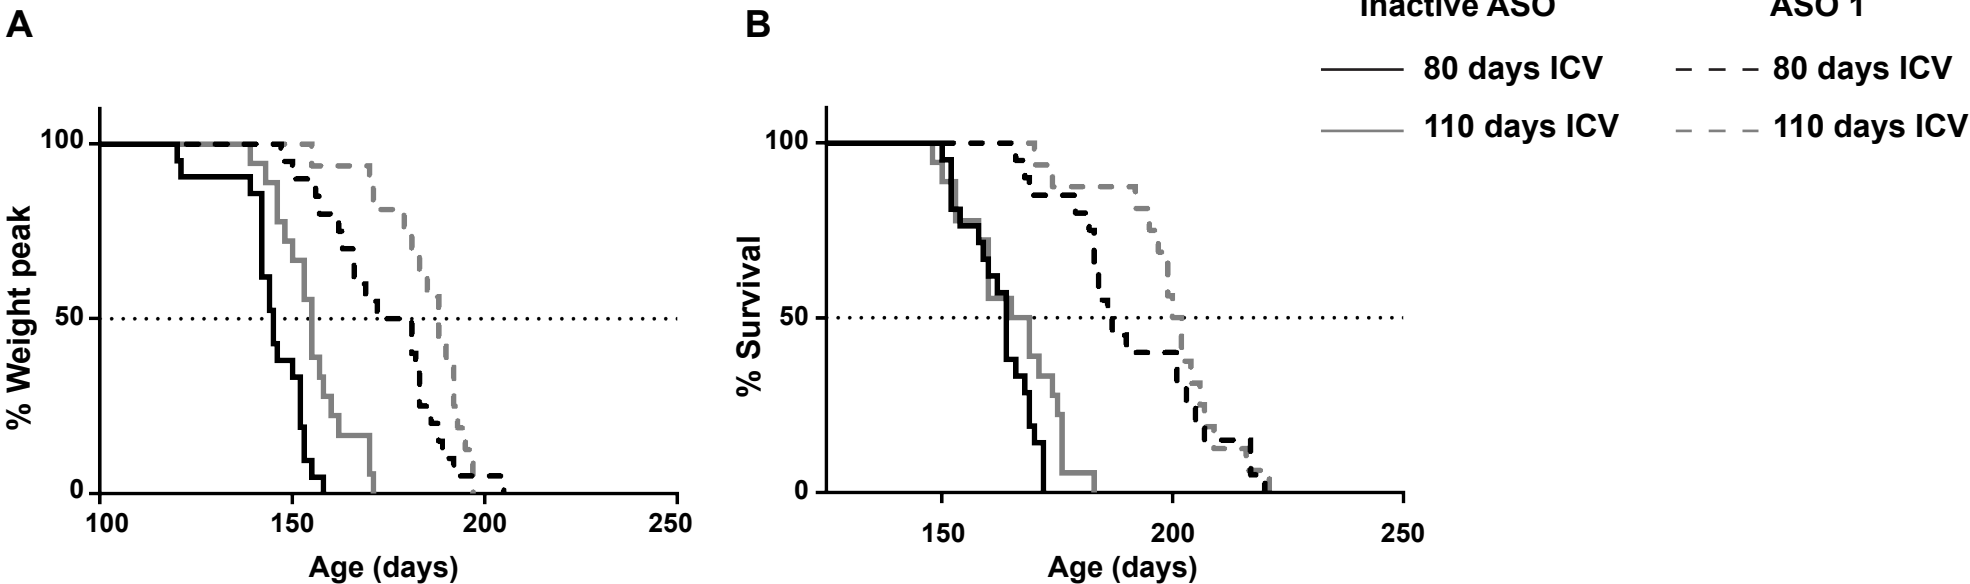

Supplemental Figure 4.

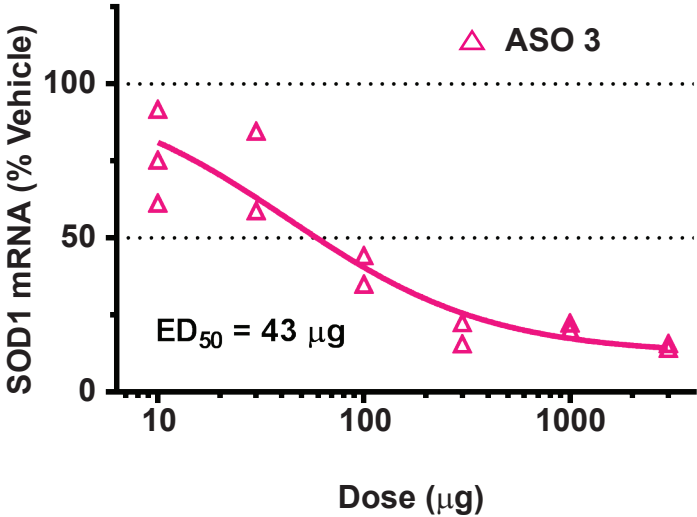

Supplemental Figure 5.

**A**

■ pNFH serum    ■ pNFH CSF    □ miR-218 CSF

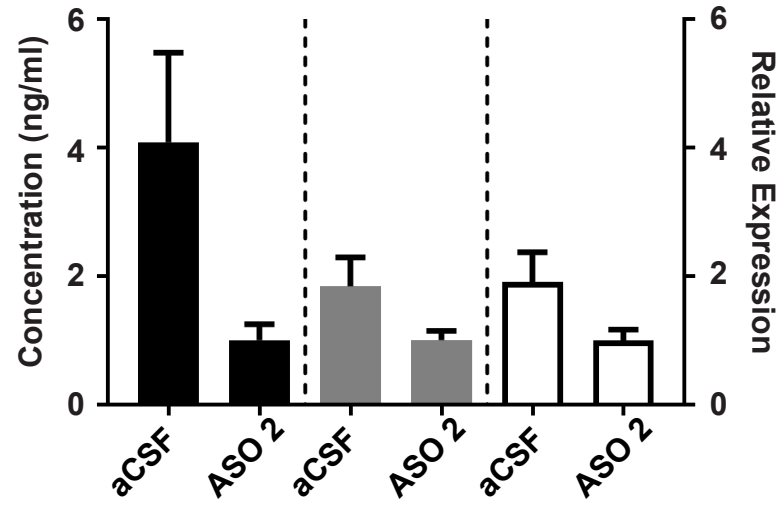

**B**

pNFH serum vs miR-218

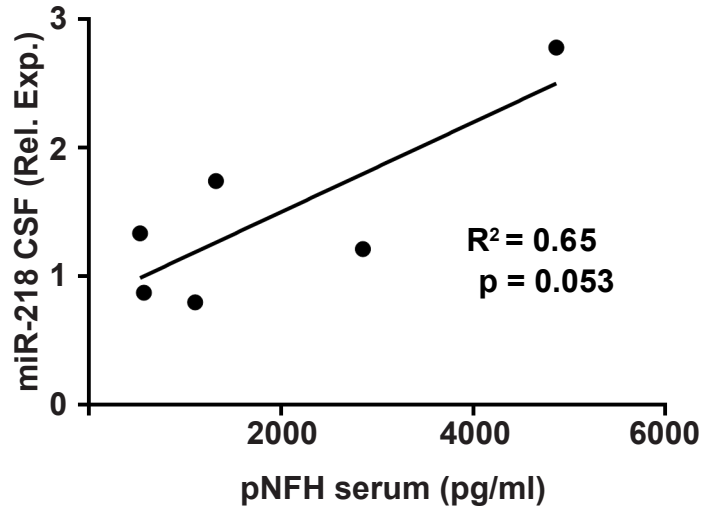

**C**

pNFH CSF vs miR-218

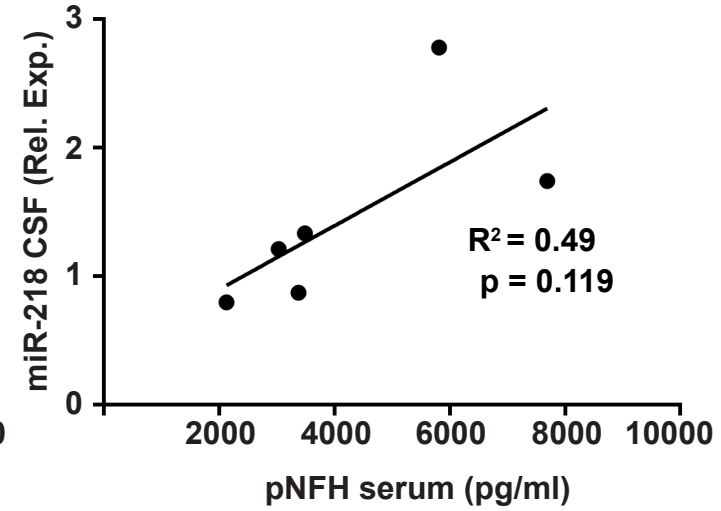



Supplemental Figure 7.

Lumbar cord

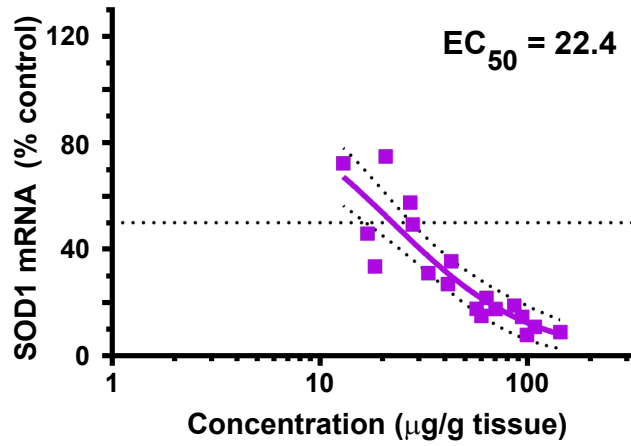

Thoracic cord

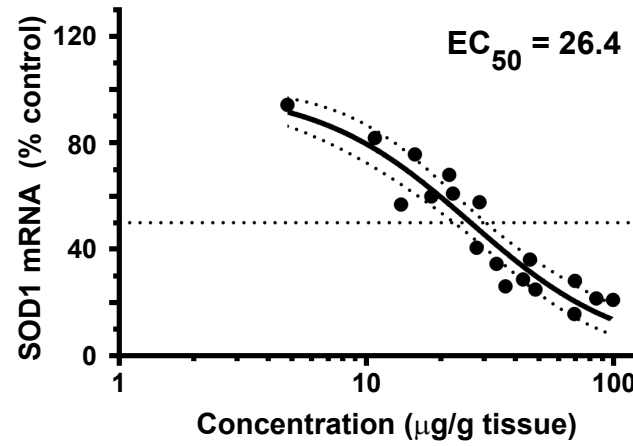

Cervical cord

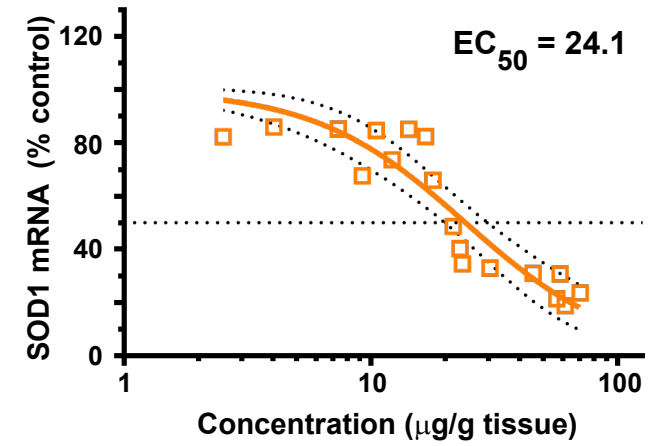

Pons

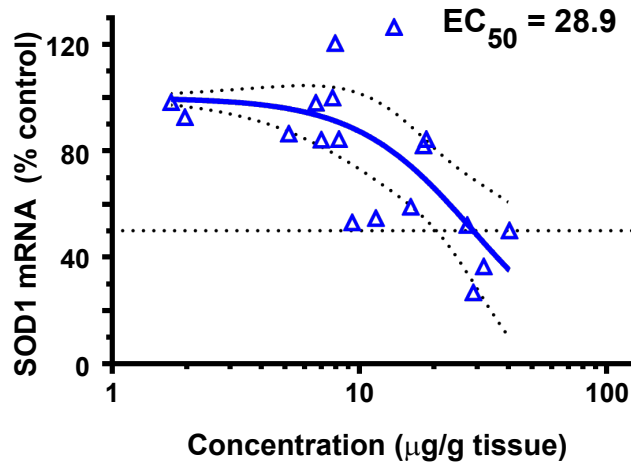

Frontal cortex

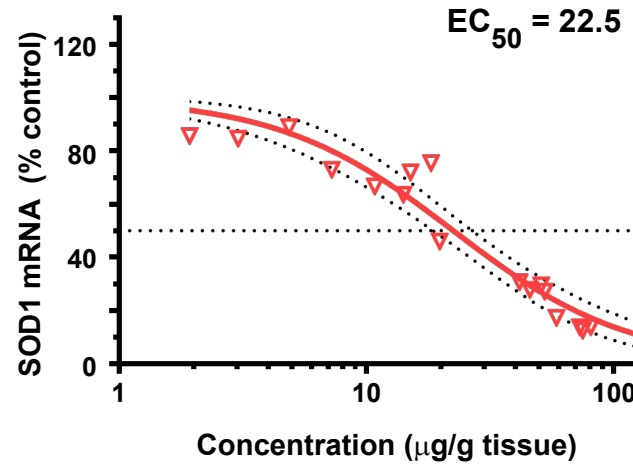

Hippocampus

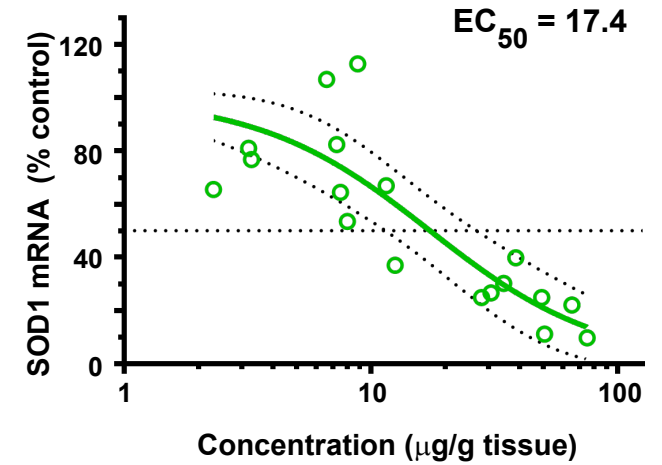

Supplement: jci-128-99081-s007.pdf [file jci-128-99081-s007.pdf]
